# Supplementary material for: Rhipicephalus Tick: A Contextual Review for Southeast Asia
Source: MDPI journal article supplement (doi:10.3390/pathogens10070821), 2021-06-30
Supplement: s1 [file s1]

## Supplementary files (Table S1 &amp; S2)

**Table S1.** List of 16S ribosomal RNA gene sequence of ticks used for phylogenetic tree construction in Figure 2

| Family    | Subfamily       | Species                           | Country      | Isolate/ strain/ voucher | Accession No. |
|-----------|-----------------|-----------------------------------|--------------|--------------------------|---------------|
| Argasidae | Argasinae       | <i>Argas cucumerinus</i>          | Chile        | Arcu                     | KX258879      |
|           |                 | <i>Argas miniatus</i>             | Brazil       | DF2                      | KY705381      |
|           |                 | <i>Argas persicus</i>             | China        | GS                       | MK555333      |
|           |                 | <i>Argas transgaripepinus</i>     | South Africa | Koegas                   | MG941007      |
|           | Ornithodorinae  | <i>Ornithodoros huajianensis</i>  | China        | AMMSC-T-10830            | MK208994      |
|           |                 | <i>Ornithodoros kalahariensis</i> | South Africa | Obra 2_1                 | MF415636      |
|           |                 | <i>Ornithodoros phacochoerus</i>  | South Africa | Oknp 2_1                 | MF415621      |
|           |                 | <i>Ornithodoros savignyi</i>      | South Africa | Osud 2GB                 | MF415646      |
|           | Antricolinae    | <i>Antricola delacruzi</i>        | Brazil       | n/a                      | EU090906      |
|           |                 | <i>Antricola guglielmonei</i>     | Brazil       | n/a                      | EU090905      |
|           |                 | <i>Antricola marginatus</i>       | USA          | n/a                      | L34324        |
|           |                 | <i>Antricola mexicanus</i>        | USA          | n/a                      | L34323        |
|           |                 | <i>Otobius megnini</i>            | Argentina    | n/a                      | EF120989      |
| Ixodidae  | Amblyomminae    | <i>Amblyomma cordiferum</i>       | Malaysia     | T26                      | MK301096      |
|           |                 | <i>Amblyomma hadanii</i>          | Argentina    | n/a                      | KJ584370      |
|           |                 | <i>Amblyomma ovale</i>            | Argentina    | n/a                      | AF541255      |
|           |                 | <i>Amblyomma lepidum</i>          | Israel       | n/a                      | KP987777      |
|           |                 | <i>Amblyomma multipunctum</i>     | Ecuador      | n/a                      | KC677673      |
|           | Haemaphysalinae | <i>Bothriocroton concolor</i>     | Australia    | n/a                      | JN863727      |
|           |                 | <i>Bothriocroton glebopalma</i>   | USA          | n/a                      | U95859        |
|           |                 | <i>Bothriocroton hydrosauri</i>   | USA          | n/a                      | U95861        |
|           |                 | <i>Bothriocroton undatum</i>      | Australia    | n/a                      | AH011488      |
|           |                 | <i>Haemaphysalis bispinosa</i>    | India        | Chipahikhola             | MF946461      |

Pathogens-1201099

|                 |                                       |              |                       |          |
|-----------------|---------------------------------------|--------------|-----------------------|----------|
| Rhipicephalinae | <i>Haemaphysalis cretica</i>          | USA          | n/a                   | L34308   |
|                 | <i>Haemaphysalis douglasi</i>         | Japan        | HD-B                  | AB819176 |
|                 | <i>Haemaphysalis kitaokai</i>         | China        | Haemaphysalis_T5124-2 | MH208573 |
|                 | <i>Haemaphysalis longicornis</i>      | China        | SZ6                   | KJ710106 |
|                 | <i>Hyalomma anatolicum excavatum</i>  | India        | Z9                    | KP210048 |
|                 | <i>Dermacentor andersoni</i>          | Canada       | n/a                   | FM955615 |
|                 | <i>Dermacentor nuttalli</i>           | China        | Neimeng               | MK032591 |
|                 | <i>Dermacentor reticulatus</i>        | Spain        | 1GV09/25              | JF791811 |
|                 | <i>Dermacentor silvarum</i>           | China        | NX-guyuan             | MK032807 |
|                 | <i>Dermacentor variabilis</i>         | Canada       | n/a                   | FN665384 |
|                 | <i>Hyalomma asiaticum</i>             | China        | IM048                 | JX051087 |
|                 | <i>Hyalomma dromedarii</i>            | USA          | n/a                   | L34306   |
|                 | <i>Hyalomma marginatum</i>            | USA          | n/a                   | L34307   |
|                 | <i>Hyalomma rufipes</i>               | South Africa | Hrufi9                | KU130464 |
|                 | <i>Nosomma monstrosum</i>             | South Africa | Nmons1                | KU130405 |
|                 | <i>Nosomma monstrosum</i>             | South Africa | Nmons2                | KU130406 |
|                 | <i>Rhipicentor bicornis</i>           | USA          | n/a                   | L34304   |
|                 | <i>Rhipicephalus appendiculatus</i>   | Uganda       | UG-3                  | KY688462 |
|                 | <i>Rhipicephalus sanguineus</i>       | Taiwan       | 16S+1.L               | DQ093297 |
|                 | <i>Rhipicephalus sanguineus</i>       | USA          | 4981                  | MH018842 |
|                 | <i>Rhipicephalus microplus</i>        | India        | T44                   | KP210071 |
|                 | <i>Rhipicephalus haemaphysaloides</i> | Thailand     | n/a                   | KC170743 |
|                 | <i>Ixodes tasmani</i>                 | Australia    | B6                    | MH043269 |
|                 | <i>Ixodes frontalis</i>               | Brazil       | Z1                    | KP769862 |
|                 | <i>Ixodes ricinus</i>                 | Canada       | CA4                   | HG916809 |
|                 | <i>Ixodes kazakstani</i>              | Kyrgyzstan   | 481-1987              | MF095803 |

|                 |              |                             |              |             |          |
|-----------------|--------------|-----------------------------|--------------|-------------|----------|
|                 |              | Pathogens-1201099           |              |             |          |
| Nuttalliellidae | Nuttalliella | <i>Ixodes persulcatus</i>   | Sweden       | 3TJ         | KX384801 |
|                 |              | <i>Ixodes dammini</i>       | China        | IPS-F8-F    | DQ093299 |
|                 |              | <i>Nuttalliella namaqua</i> | South Africa | Nn_Gut_Liz4 | JF729313 |
|                 |              | <i>Nuttalliella namaqua</i> | South Africa | Nn_Gut_Liz8 | JQ739172 |

**Table S2.** Economic losses

| Country         | Cattle (head) | Milk Cow (head) | Financial Loss (USD) | Milk Loss                          | Potential Milk Loss      |
|-----------------|---------------|-----------------|----------------------|------------------------------------|--------------------------|
|                 | [a]           | [b]             | [a x 7.3 USD]        | (litres) [c]<br>[b x 90.24 litres] | (USD)<br>[c x 0.34 USD*] |
| Brunei          | 4,752         | 106             | 34,690               | 9,565                              | 3,252                    |
| Cambodia        | 469,542       | 121,627         | 3,427,657            | 10,975,620                         | 3,731,710                |
| Indonesia       | 2,498,083     | 561,061         | 18,236,006           | 50,630,145                         | 17,214,249               |
| Laos            | 280,937       | 44,879          | 2,050,840            | 4,049,881                          | 1,376,959                |
| Malaysia        | 105,923       | 41,599          | 773,238              | 3,753,894                          | 1,276,323                |
| Myanmar         | 1,811,211     | 3,900,000       | 13,221,840           | 351,936,000                        | 119,658,240              |
| Singapore       | 77            | -               | 562                  | -                                  | -                        |
| Thailand        | 907,093       | 220,000         | 6,621,779            | 19,852,800                         | 6,749,952                |
| The Philippines | 881,212       | 5,420           | 6,432,848            | 489,101                            | 166,294                  |
| Timor-Leste     | 11,124        | -               | 81,205               | -                                  | -                        |
| Vietnam         | 1,794,421     | 317,729         | 13,099,273           | 28,671,865                         | 9,748,434                |
| Total           | 8,764,375     | 52,124,21       | 63,979,938           | 470,368,871                        | 159,925,416              |

Source: FAOSTAT 2019 (<http://www.fao.org/faostat/en/#data/QL>)

\* Milk priced average 0.34 USD/litre in 2019 according to trading on a contract for difference (CFD) that tracks the benchmark market for this commodity (5 March 2021).
